# Supplementary material for: Guide à destination des candidats
Source: Oxford University Press journal article supplement (doi:10.1242/jcs.166330), 2016-02-18
Supplement: jcs166330supp.pdf [file jcs166330supp.pdf]

## Supplemental material

### Supplemental Table S1

Table S1: Summary of parameters estimated from measurements and theory

| Parameter               | Description                                                                                | Value              | Note   |
|-------------------------|--------------------------------------------------------------------------------------------|--------------------|--------|
| $\Delta\Pi_{n0}$        | Osmotic pressure difference across the nuclear envelope in the adherent state (Pa)         | 839 <sup>a</sup>   | Solved |
| $F$                     | Force applied by actin fibers atop the nucleus in the adherent state (nN)                  | 122 <sup>a</sup>   | Solved |
| $P_{m0}$                | Pressure applied by microtubules in the adherent state (Pa)                                | 23.3 <sup>a</sup>  | Solved |
| $P_{mi}$                | Increased pressure applied by microtubules in the suspended state (Pa)                     | 1.6 <sup>a</sup>   | Fitted |
| $\gamma = \Pi_{n0}/\mu$ | Ratio between the osmotic pressure inside the nucleus and the shear modulus of the nucleus | 50                 | Fitted |
| $\bar{\alpha}$          | Rate constant of water transport ( $\text{min}^{-1}$ )                                     | $3 \times 10^{-3}$ | Fitted |

<sup>a</sup>The shear modulus of the nuclear envelope has been taken as  $\mu \sim 10^4\text{Pa}$

### Supplemental Figures

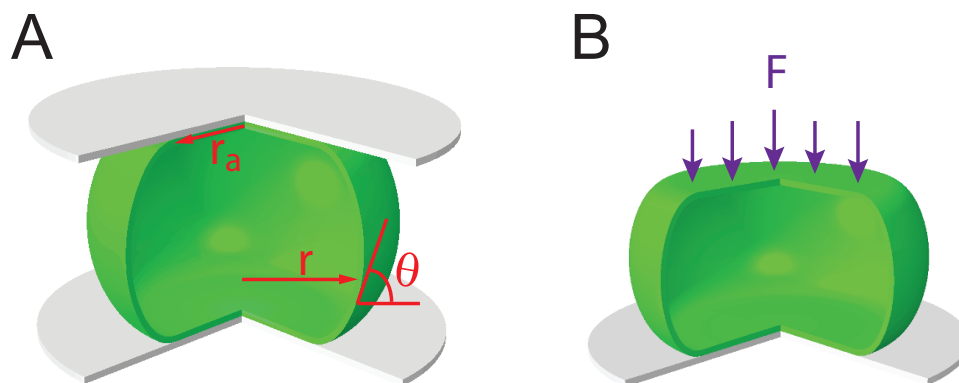

Figure S1: Schematic of the cell nucleus in the attached state. (A) We model the compression force from perinuclear actin stress fibers as a compressive plate. (B) The total force from actin stress fibers is  $F$ .

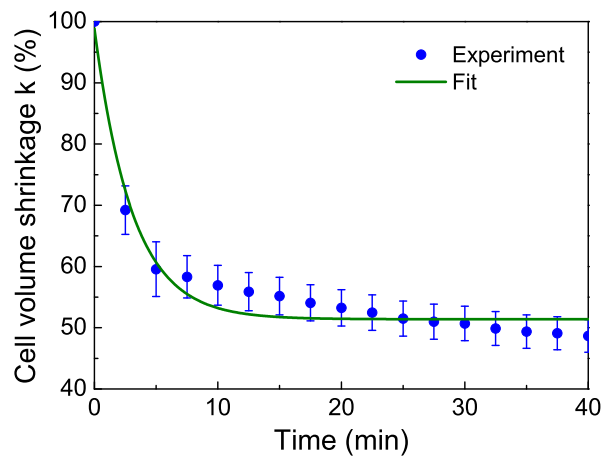

Figure S2: Shrinkage in MEF cell volume during detachment from the substrate as computed from  $k(t) = V_c(t)/V_{c0}$  (standard errors are computed from 37 cells). The volume decreased by 50%. The green line is a numerical fit to the data, which is then used in Eq. 17 to compute the nuclear volume.

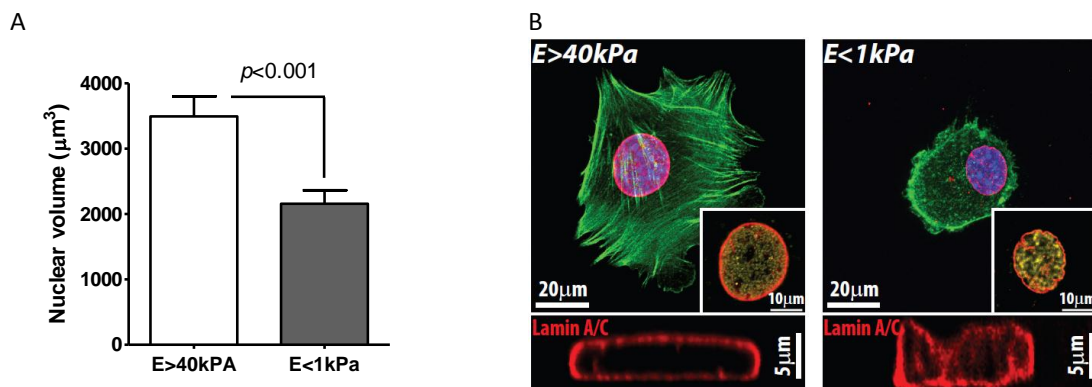

Figure S3: Nuclear volume change in MEF cells on substrates of different stiffness. (A) Average nuclear volume for cells on stiff ( $E > 40\text{kPa}$ ) and soft ( $E < 1\text{kPa}$ ) polyacrylamide hydrogels.  $N > 20$  cells were tested per condition (B) 3D reconstructed images of cell nuclei on stiff and soft substrates. Images are modified from Fig. 3J and K in Kim and Wirtz (2015).

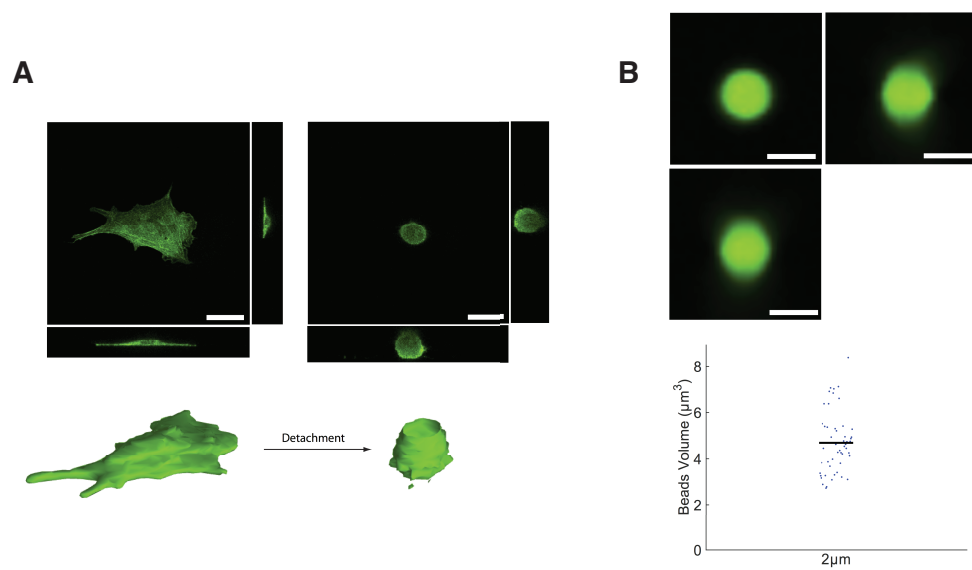

Figure S4: (A) 3D confocal images of MEF cells in attached and detached state. The reconstructed shapes are shown below. The scale bar is  $30\mu\text{m}$ . (B) 3D confocal images of  $2\mu\text{m}$  diameter beads. The scale bar is  $2\mu\text{m}$ . The average computed volume is within 10% of the theoretical volume, but there are significant measurement errors for small beads.

## Supplemental Movies

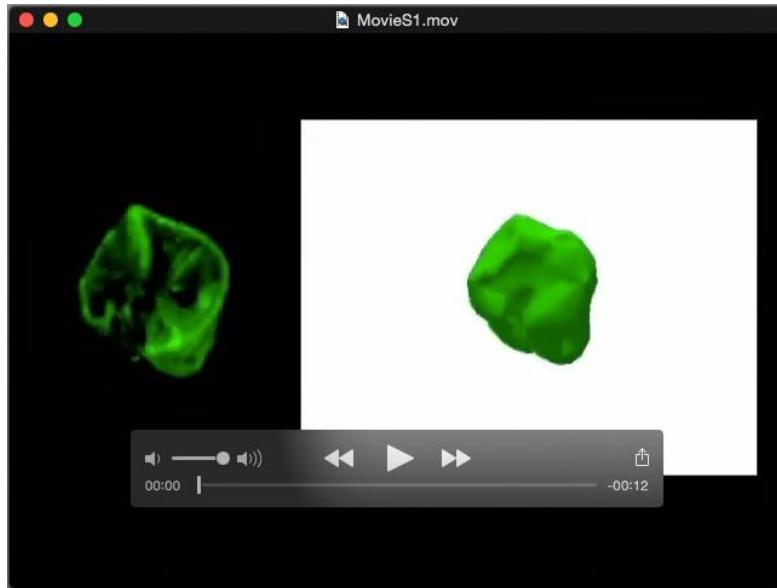

**Movie 1** A movie comparing the 3D confocal images of the nucleus with the 3D reconstructed nucleus.
